**TITLE: Host resistance diversity protects susceptible genotypes by restricting pathogen spread and evolution**

Jack Common<sup>1</sup>, David Walker-Sünderhauf<sup>2</sup>, Stineke van Houte<sup>1</sup>, Edze R. Westra<sup>1</sup>

**AFFILIATION:** <sup>1</sup>ESI and CEC, Biosciences, University of Exeter, Cornwall Campus, Penryn TR10 9EZ, UK

<sup>2</sup>European Centre for Environment and Human Health, University of Exeter Medical School, ESI, Cornwall Campus, Penryn TR10 9FE, UK

**CONTACT:** JC: [jc860@exeter.ac.uk](mailto:jc860@exeter.ac.uk) DWS: [ds498@exeter.ac.uk](mailto:ds498@exeter.ac.uk) SVH: [C.van-Houte@exeter.ac.uk](mailto:C.van-Houte@exeter.ac.uk) ERW: [E.R.Westra@exeter.ac.uk](mailto:E.R.Westra@exeter.ac.uk). Please address correspondence to Jack Common and Edze R. Westra

**RUNNING TITLE:** Host diversity protects susceptible genotypes

**KEYWORDS:** CRISPR-Cas, *Pseudomonas aeruginosa*, phage, experimental evolution, host-pathogen, evolutionary emergence

**ARTICLE TYPE:** Letter

**ABSTRACT LENGTH:** 146 words

**MAIN TEXT LENGTH:** 4944 words

**NUMBER OF REFERENCES:** 69

**NUMER OF FIGURES:** 3

**STATEMENT OF AUTHORSHIP:** JC conducted experiments and analyses. DWS and SVH designed plasmids and cloning methods. ERW conceived of and designed the study. JC wrote the manuscript, DWS, SVH and ERW provided critical revisions.

**DATA ACCESSIBILITY STATEMENT:** Raw data used in this study will be archived in an appropriate public repository

1 **Abstract**

2

3 Diversity in host resistance often associates with reduced pathogen spread. This  
4 may result from limitation of pathogen evolution, and reduced pathogen reproduction  
5 due to the dilution of focal hosts. Theory and experiments on bacteria-phage  
6 interactions have shown that genetic diversity of the bacterial adaptive immune  
7 system can limit phage evolution to overcome resistance. Here we explore how  
8 immune diversity impacts the spread of phage when they can overcome a resistance  
9 allele, and whether immune diversity affects the evolution of the phage to increase  
10 its host range. We show that higher diversity benefits both susceptible and resistant  
11 bacteria by limiting the spread of the phage, and this is linked to a reduced  
12 probability that phage acquire further mutations to overcome other resistance alleles.  
13 These data highlight the tight link between the epidemiological and evolutionary  
14 consequences of host resistance allele diversity and their key consequences for  
15 host-pathogen interactions.

## 16 **Introduction**

17

18 Genetic diversity is a key determinant of the ecology and evolution of host-pathogen  
19 systems. Various studies of wild organisms have shown that the genetic diversity of  
20 host species often affects pathogen prevalence. Species with small population sizes,  
21 for example as a result of human-induced bottlenecks, are particularly vulnerable to  
22 pathogens because of their reduced genetic diversity. Wild cheetahs were shown to  
23 have higher viral loads of coronavirus associated with reduced heterozygosity  
24 (O'Brien *et al.*, 1985); fragmented, low-diversity subpopulations of Italian agile frogs  
25 were more susceptible to *Ranavirus* (Pearman & Garner, 2005); and more diverse  
26 populations of wild parrots have been shown to have reduced prevalence of beak  
27 and feather disease virus (Eastwood *et al.*, 2017). Reductions in heterozygosity  
28 associated with inbreeding are associated with increases in host susceptibility  
29 (Spielman *et al.*, 2004; Ebert *et al.*, 2007; Ellison & Adamec, 2011; Kerstes &  
30 Wegner, 2011). In the wild, inbred populations of black-footed ferrets were more  
31 prone to canine distemper virus (Thorne & Williams, 1988), and inbred individual  
32 California sea lions were more likely to act as pathogen reservoirs (Acevedo-  
33 Whitehouse *et al.*, 2003). Reductions in diversity associated with founder effects  
34 have been shown to affect pathogen prevalence, for example in young island  
35 populations of deer mice (Meagher, 1999) and Galapagos hawks (Whiteman *et al.*,  
36 2007). The importance of diversity for limiting disease in agricultural contexts has  
37 long been recognised (Elton, 1958), for example in rice (Zhu *et al.*, 2000) and  
38 hybridising populations of honeybees (López-Urbe *et al.*, 2017). In laboratory  
39 environments, more genetically diverse populations of *Daphnia magna* are more  
40 resistant to parasites (Altermatt & Ebert, 2008), an effect that depends on the genetic

41 architecture of resistance (Luijckx *et al.*, 2013). In microbial systems, *Pseudomonas*  
42 *aeruginosa* PA14 and *Streptococcus thermophilus* with diverse immunity alleles  
43 were shown to be more resistant against lytic bacteriophage (van Houte *et al.*, 2016;  
44 Morley *et al.*, 2017).

45

46 The suggested reasons for the increase in host resistance can be broadly divided  
47 into evolutionary and epidemiological effects of diversity. Theory suggests that host  
48 diversity may limit the evolutionary emergence of novel pathogen genotypes (Sasaki,  
49 2000; Ohtsuki & Sasaki, 2006), potentially because the increased prevalence of  
50 susceptible hosts in less diverse populations can increase the supply of novel  
51 pathogen mutations (Antia *et al.*, 2003; Dennehy *et al.*, 2006; Yates *et al.*, 2006).

52 Further theory and experimental work have suggested that this evolutionary effect of  
53 diversity may peak at intermediate levels of host diversity (Benmayor *et al.*, 2009;  
54 Chabas *et al.*, 2018). Even if a pathogen evolves to overcome a resistance allele of  
55 the host, pathogen spread may be more limited in host populations with greater  
56 genetic diversity. This epidemiological effect of diversity may manifest through a  
57 dilution effect (Ostfeld & Keesing, 2012; Civitello *et al.*, 2015). Increasing the number  
58 of resistant or low-quality hosts decreases the fraction of susceptible hosts, reducing  
59 contact rates between free-living pathogens and susceptible hosts, which in turn  
60 limits the basic reproduction number of the pathogen ( $R_0$ ) (Dobson, 2004; Gandon,  
61 2004; Lively, 2010). There is much observational support for the role of a dilution  
62 effect in host-pathogen systems (reviewed in Civitello *et al.* (2015)), and some  
63 experimental work has suggested that dilution of susceptible hosts can limit  
64 pathogen spread (Dennehy *et al.*, 2007; Common & Westra, 2019). However, the  
65 evolutionary and epidemiological effects of host diversity are likely to depend on one

66 another, as the basic reproductive value of a pathogen will influence its ability to  
67 evolve to overcome host resistance (Antia *et al.*, 2003).

68

69 The interaction between lytic bacteriophage (phage) and the bacterial CRISPR-Cas  
70 (Clustered Regularly Interspaced Short Palindromic Repeats; CRISPR-associated)  
71 immune system represents a tractable model system to study the evolutionary  
72 epidemiology of infectious diseases, including the role of host diversity (van Houte *et*  
73 *al.*, 2016; Westra *et al.*, 2017; Chabas *et al.*, 2018). CRISPR-Cas immune systems  
74 can incorporate short DNA fragments (spacers) of about 30 base pairs derived from  
75 the phage genome into CRISPR loci on the host genome (Horvath *et al.*, 2008).  
76 Processed CRISPR transcripts guide Cas immune complexes to identify and cleave  
77 the invading phage genome, preventing successful re-infections (Brouns *et al.*, 2008;  
78 Marraffini & Sontheimer, 2008; Garneau *et al.*, 2010; Datsenko *et al.*, 2012). In turn,  
79 phage can evolve to overcome CRISPR immunity by point mutation in the sequence  
80 targeted by the spacer (protospacer) or in the protospacer-adjacent motif (PAM),  
81 which flanks the protospacer and functions in self/non-self discrimination (Deveau *et*  
82 *al.*, 2008; Mojica *et al.*, 2009; Semenova *et al.*, 2011; Westra *et al.*, 2013). Phage  
83 evolution to overcome CRISPR immunity can lead to CRISPR-phage coevolution  
84 (Paez-Espino *et al.*, 2013; Paez-Espino *et al.*, 2015; Sun *et al.*, 2016; Common *et al.*,  
85 2019). However, CRISPR loci in both natural and experimental populations can be  
86 highly diverse (Andersson & Banfield, 2008; Paez-Espino *et al.*, 2013; Westra *et al.*,  
87 2015; Common *et al.*, 2019), due to different bacteria in the population acquiring  
88 different spacers (Westra *et al.*, 2017). Diversity has important implications for the  
89 coevolutionary interaction, as CRISPR diversity can provide increased resistance by  
90 limiting the ability of phage to acquire the mutations needed to overcome CRISPR

91 resistance, which in turn can drive rapid phage extinction (van Houte *et al.*, 2016;  
92 Morley *et al.*, 2017; Chabas *et al.*, 2018).

93

94 Apart from this evolutionary effect, theory predicts that even if a phage mutant  
95 evolved that can overcome one CRISPR resistance allele in the population, its ability  
96 to amplify will be reduced in a more diverse host population (Lively 2010). Moreover,  
97 this in turn is predicted to reduce the ability of the phage to evolve to overcome other  
98 CRISPR resistance alleles in the population (Antia *et al.*, 2003; Chabas *et al.*, 2018),  
99 but these predictions remain untested. We therefore set out to explicitly test the  
100 epidemiological role of host diversity and its knock-on evolutionary effects using the  
101 bacteria *Pseudomonas aeruginosa* and its lytic phage DMS3vir. We performed an  
102 experiment where we manipulated the degree of CRISPR diversity in the host  
103 population by mixing different numbers of CRISPR-resistant clones, and measured  
104 host fitness, phage population dynamics and evolution, following infection with a  
105 phage that was pre-evolved to infect one CRISPR resistance allele in the population.

## 106 **Materials & Methods**

107

### 108 *Bacterial strains and phage*

109

110 Evolution experiments were carried out using *Pseudomonas aeruginosa* UCBPP-  
111 PA14 (which has two CRISPR loci, CRISPR1 and CRISPR2), UCBPP-PA14  $\Delta pilA$   
112 (this strain lacks the pilus, which is the phage DMS3 receptor, and therefore displays  
113 surface-based resistance) and phage DMS3vir (Zegans *et al.*, 2009). We used *P.*  
114 *aeruginosa* UCBPP-PA14 *csy3::lacZ* (Cady *et al.*, 2012), which carries an inactive  
115 CRISPR-Cas system, for phage amplification, and for top lawns in phage spot and  
116 plaque assays. *P. aeruginosa* PA14 *csy3::lacZ*, *Escherichia coli* DH5 $\alpha$  (NEB), *E. coli*  
117 CC118  $\lambda$ pir (NEB), and *E. coli* MFDpir (Ferrieres *et al.*, 2010) were used for  
118 molecular cloning.

119

### 120 *Library of BIMs and escape phages*

121

122 To control the levels of CRISPR diversity in our evolution experiments, we  
123 established a library of 24 *P. aeruginosa* PA14 clones each carrying a single spacer  
124 in CRISPR2 (bacteriophage-insensitive mutants; BIMs). 11 *P. aeruginosa* PA14  
125 BIMs that were known to have a single CRISPR2 spacer were selected from the  
126 collection of clones used in van Houte *et al.* (2016). The additional 13 BIMs were  
127 generated by evolving *P. aeruginosa* PA14 in the presence of DMS3vir. 6ml of M9  
128 minimal media (supplemented with 0.2% glucose; M9m) was inoculated with  
129 approximately  $10^6$  colony-forming units (cfu) of WT *P. aeruginosa* and  $10^4$  plaque-  
130 forming units (pfu) of phage in glass vials. After 24hrs, samples from the infection

131 were plated on LB agar. Potential CRISPR clones were identified through phenotypic  
132 and PCR analyses as described previously (Westra 2015; van Houte 2016). CRISPR  
133 amplicon sequencing (SourceBioscience, UK) confirmed that each spacer carried by  
134 a BIM was unique, so that all clones used in downstream experiments carried a  
135 different spacer. Spacer sequences were mapped against the DMS3vir genome  
136 (Genbank accession: NC\_008717.1) using Geneious v9.1.8 (Kearse *et al.*, 2012) to  
137 confirm that spacers did not target overlapping regions of the phage genome. See  
138 **Table S1** in **Supporting Information** the spacer sequences of each BIM.

139

140 Next, we independently evolved 24 phage clones that could infect each BIM (escape  
141 phage). 15ml LB was inoculated with approximately  $10^6$  cfu of a single BIM and  
142 approximately  $10^6$  pfu DMS3vir. We also added approximately  $10^6$  of *P. aeruginosa*  
143 PA14 *csy3::lacZ* to provide a pool of sensitive hosts on which phage could replicate  
144 and hence supply novel escape mutations. Phage extracted from these  
145 amplifications were plaque-purified to ensure a monoclonal phage stock. Each  
146 escape phage was challenged against the entire BIM library to check for a one-to-  
147 one infection match. A successful infection was defined if a clear lysis zone was  
148 visible in the top lawn of the target BIM.

149

#### 150 *Generating labelled BIMs*

151

152 To be able to monitor the population dynamics and relative fitness of individual  
153 bacterial clones within the mixed populations over the course of the co-culture  
154 experiment, we transformed 8 BIMs to carry a *lacZ* reporter gene. The *LacZ* gene  
155 encodes the  $\beta$ -galactosidase enzyme that hydrolyses 5-bromo-4-chloro-3-indolyl- $\beta$ -



156 D-galactopyranoside (X-gal), resulting in the production of a blue pigment. The BIMs  
157 chosen for transformation were such that a single clone could be monitored in each  
158 of the 3-clone mixtures (that is, BIMs 1, 4, 7, 10, 13, 19, and 22; see **Table S1**),  
159 which enabled us to measure relative frequency and fitness of a labelled BIM  
160 through time by performing a blue:white screen when plating on LB agar  
161 supplemented with 40µg/ml X-gal.

162

163 All cloning reactions to generate the labelled BIMs were carried out according to  
164 manufacturers' instructions unless stated otherwise. Restriction enzymes, Antarctic  
165 phosphatase, and T4 DNA ligase were purchased from NEB; HF versions were used  
166 if available. Strains, primers, and plasmids used for molecular work are outlined in  
167 **Table S2**. We used the synthetic mini-Tn5 transposon vector pBAMD1-6 (Martínez-  
168 García *et al.*, 2014) to deliver the *lacZ* gene to target BIMs. pBAMD1-6 is a non-  
169 replicative vector in *P. aeruginosa* encoding a Tn5 transposase, which allows for  
170 insertion of a gentamicin resistance gene (GmR) as well as any cargo genes into the  
171 bacterial chromosome. To introduce *lacZ* as a cargo gene, we amplified it from PA14  
172 *csy3::lacZ* using primers *lacZ\_amp\_fw* and *lacZ\_amp\_rv* (**Table S2**) using Phusion  
173 High-Fidelity Polymerase (ThermoFisher). The PCR product was cleaned up  
174 (QIAGEN PCR cleanup kit) and sub-cloned into pMA-RQ\_Cas (Walker-Sünderhauf,  
175 unpublished) using NcoI-HF and KpnI-HF to generate a construct in which *lacZ* gene  
176 expression is driven by a constitutive  $\beta$ -lactamase promoter P3 (Genbank accession:  
177 J01749, region 4156..4233). Using standard molecular cloning protocols and  
178 restriction enzymes HindIII-HF and KpnI-HF, this promoter and the downstream *lacZ*  
179 gene was inserted into pBAMD1-6 to generate pBAM1(Gm)\_*lacZ*. pBAM1(Gm)\_*lacZ*  
180 was transferred into *E. coli* MFD*pir* by electroporation.

181

182 Tn5 insertions of the recipient BIMs were carried out by conjugative  
183 pBAM1(Gm)\_lacZ delivery. *E. coli* MFDpir + pBAM1(Gm)\_lacZ was used as donor  
184 and grown overnight in 5ml LB + 0.3mM diaminopimelic acid (DAP) + 30 µg/ml  
185 gentamicin at 37°C, 180 rpm. Recipient BIMs were grown overnight in 5ml LB at  
186 37°C, 180rpm. 10ml of fresh media was inoculated from these overnight cultures,  
187 and grown at 37°C and 250rpm until OD<sub>600</sub> ~ 0.6, then pelleted and washed twice in  
188 1x M9 salts, and resuspended in 1ml 1 x M9 salts. 600µl of donors were mixed with  
189 200µl recipients, pelleted, and resuspended to a volume of 100µl. The entire donor-  
190 recipient mixture was pipetted onto sterile 0.2µm microfiber glass filters (Whatman)  
191 on LB agar + 0.3mM DAP plates and incubated for 2 days at 37°C. To recover cells,  
192 filters were placed into 2.5ml LB and vortexed. 100µl of recovered cells were plated  
193 onto LB agar + 30 µg/ml gentamicin + 40µg/ml X-gal + 0.1mM IPTG plates and  
194 incubated at 37°C for 2 days to select for BIMs with Tn5 insertions in their genome  
195 (absence of DAP selects against the donor strain).

196

197 Because Tn5 inserts at random positions in the *P. aeruginosa* genome, this may  
198 affect fitness. We therefore sampled three blue colonies of the transformants and  
199 conducted 24hr competition experiments against their untransformed counterpart to  
200 verify their fitness was unaffected. The relative fitness of the transformed BIM was  
201 calculated as described previously ( $W_n = [(fraction\ strain\ A\ at\ t_n) * (1 - (fraction\ stain$   
202  $A\ at\ t_0))] / [(fraction\ strain\ A\ at\ t_0) * (1 - (fraction\ strain\ A\ at\ t_n))]$ )(Westra *et al.*, 2015).  
203 If Tn5 insertion disrupted the CRISPR-Cas system, the transformed BIM would  
204 regain susceptibility to ancestral DMS3vir. We therefore checked for this by spotting

205 ancestral DMS3vir on a top lawn of the transformed BIM. If no clear lysis zone was  
206 visible on the top lawn, we determined that the CRISPR-Cas system was functional.

207

### 208 *Co-culture experiment*

209

210 We designed 5 treatments in which we manipulated the level of CRISPR spacer  
211 diversity, based on the BIM library: monocultures (1-clone), or polycultures  
212 consisting of 3, 6, 12 and 24 clones. For each of the polyclonal treatments, a single  
213 BIM carrying the *lacZ* reporter gene was included. From fresh overnight cultures of  
214 each BIM, we made mixes of equal proportion of each clone corresponding to the  
215 diversity treatments. To monitor the population dynamics and competitive  
216 performance of the CRISPR-resistant population as a whole, we also added PA14  
217  $\Delta pilA$  (surface mutant; SM, which is fully resistant to phage DMS3vir and has a  
218 distinct “smooth” colony morphology) to each mix in equal proportion to the CRISPR  
219 population. We then inoculated 6ml of M9m 1:100 from each mix. Approximately  
220  $1 \times 10^6$  pfu ml<sup>-1</sup> of the escape phage targeting the labelled BIM were then added to  
221 each vial. We also established 1- and 24-clone treatments with ancestral phage as  
222 controls. Polyclonal treatments consisted of 8 biological replicates ( $N=8$ ) to ensure  
223 that both BIMs and phage were equally represented across treatments, while the 1-  
224 clone treatments consisted of 24 biological replicates ( $N=24$ ). Glass vials were  
225 incubated at 37°C while shaking at 180rpm. At 1, 2, and 3 days-post infection (dpi),  
226 the sampling of the phage and bacterial culture was repeated as described. Cultures  
227 were transferred 1:100 to fresh media after sampling had been carried out. The  
228 experiment was terminated at 3 dpi.

229

230 Each day 180µl of culture was taken from each vial and phage was extracted using  
231 chloroform. Phage titres were determined by serially diluting extracted phage in 1x  
232 M9 salts, and then spotting 5µl of each dilution on a top lawn of *P. aeruginosa* PA14  
233 *csy3::lacZ*, which was then incubated at 37°C for 24hrs. Phage titres were calculated  
234 from this assay. The detection limit of phage spot assays is 10<sup>2</sup> pfu ml<sup>-1</sup>. To monitor  
235 bacterial densities, culture samples were serially diluted in 1x M9 salts, and then  
236 plated on LB agar + 40µg/ml X-gal + 0.1mM IPTG, and incubated for 48hrs at 37°C.  
237 The density of SM, CRISPR and the labelled BIM was then calculated. SM were  
238 differentiated from CRISPR clones by their “smooth” colony morphology, and the  
239 labelled BIM was identified by the blue:white screen.

240

241 We assessed the competitive performance of the CRISPR relative to SM clones and  
242 the labelled BIM relative to non-labelled BIMs by calculating selection rate ( $r_n = (\ln$   
243  $[\text{density strain A at } t_n / \text{density strain A at } t_{n-1}] - \ln[\text{density strain B at } t_n / \text{density strain B}$   
244  $\text{at } t_{n-1}]) / \text{day}$ ) (Lenski, 1991; Travisano & Lenski, 1996), which expresses competitive  
245 performance as the natural log of the relative change in density of one competitor  
246 against another.

247

### 248 *Phage evolution*

249

250 We examined phage evolution during the experiment by sampling 12 individual  
251 plaques from each replicate that had detectable levels of phage from 1 to 3 dpi,  
252 which were amplified on PA14 *csy3::lacZ* overnight in LB, at 37°C and shaking at  
253 180rpm. Phage were extracted using chloroform, and then diluted 1000-fold.  
254 Samples of each phage were then applied on lawns of each of the 24 BIMs and WT

255 PA14 *csy3::lacZ*. A successful infection was indicated by a clear lysis zone on the  
256 top lawn. Phage were classified according to whether they had expanded their  
257 infectivity range (could infect the original susceptible clone and a new clone in the  
258 BIM library). Of the phages that had undergone a host shift (lost infectivity to the  
259 original clone and could only infect a new clone), we confirmed their expanded  
260 infectivity range by sequencing the old and new protospacers on the evolved phage  
261 genome (SourceBioscience, UK). We also sequenced the relevant protospacers of  
262 the pre-evolved escape phage from the BIM-phage library and ancestral DMS3vir.  
263 Primers are given in **Table S3**.

264

#### 265 *Statistical analyses*

266

267 All statistical analyses were carried out in R v3.5.2 (R Core Team, 2018). The  
268 packages dplyr (Wickham *et al.*, 2018), tidyr (Henry & Wickham, 2018) and magrittr  
269 (Bache & Wickham, 2014) were used throughout for data handling. Generalised  
270 linear mixed models (GLMMs) were used throughout, and replicate was treated as a  
271 random effect in all models. Model selection followed a nested approach, where full  
272 versus reduced models were compared using information criteria (Burnham &  
273 Anderson, 2003, 2004), and the similarity between observed and predicted values.  
274 The overall statistical significance of fixed effects was evaluated with likelihood ratio  
275 tests (LRTs). Probit models (the inverse standard normal distribution of the  
276 probability) were used to analyse phage evolution. When phage titre was considered  
277 as the response variable, data was log-transformed to improve model fit. Confidence  
278 intervals around model coefficients and predicted means were calculated to the 95%,

279 89% and 67% level to give the reader a clearer indication of effect size. The package  
280 ggplot2 (Wickham, 2009) was used to generate figures.

## 281 Results

282

283 To explore how population-level immune diversity would influence the population  
284 dynamics and evolution of an escape phage and its susceptible host genotype, we  
285 first generated 24 *P. aeruginosa* clones that differed only by a single CRISPR spacer  
286 and that are resistant to phage DMS3vir. Next, we generated 24 DMS3vir escape  
287 phage isolates, each of which could infect a single unique clone among the 24. This  
288 gives a host-pathogen system where one host genotype is infected by one pathogen  
289 genotype (**Fig. S1**). We then set up an experiment where we mixed 1-, 3-, 6-, 12-  
290 and 24-clones, and inoculated each treatment with an escape phage infecting only  
291 one of the clones. The susceptible clone (i.e. the one that could be infected by the  
292 escape phage) always carried a *lacZ* reporter gene, so we could follow its population  
293 dynamics and competitive performance during the experiment. *P. aeruginosa*  $\Delta$ *pilA*,  
294 which only resists phage infection via surface receptor modification, was included in  
295 each treatment to provide a benchmark against which the dynamics and  
296 performance of the entire CRISPR population could be measured. We also included  
297 1- and 24-clone treatments inoculated with ancestral phage to which the whole  
298 bacterial population was resistant, which served as a control (van Houte *et al.*,  
299 2016). We then monitored population dynamics and evolution of the phage, CRISPR  
300 clones and the susceptible clone over 3 days.

301

302 We first examined how CRISPR allele diversity influenced phage population  
303 dynamics (**Fig. 1**). Phage densities decreased more rapidly as CRISPR diversity  
304 increased (Diversity:  $\chi^2_{(1)} = 15.7$ ,  $p = 7.5 \times 10^{-5}$ ; Time:  $\chi^2_{(1)} = 36.9$ ,  $p = 1.23 \times 10^{-9}$ ;  
305 **Fig. S2**), which is consistent with a protective effect of CRISPR diversity. The

306 ancestral phage controls show that phage titre over time in a monoclonal (and  
307 initially resistant) host population is statistically similar to that observed when an  
308 escape phage infects a monoclonal (but susceptible) population (**Fig. S2**). This is in  
309 line with previous data showing that CRISPR-resistant monocultures allow phage  
310 persistence due to rapid evolution of escape phages that overcome the CRISPR  
311 resistance allele (van Houte *et al.*, 2016). When comparing the population dynamics  
312 of ancestral and escape phage during infection of polyclonal bacterial populations,  
313 the escape phage did appear to benefit from its ability to infect a fraction of the  
314 population. When infecting the 24-clone population with ancestral phage, phage  
315 titres were reduced compared to the same infection treatment with the infectious  
316 escape phage (difference in log pfu ml<sup>-1</sup>:  $\beta$  [95% CI] = -2.40 [-4.65, -0.44]; **Fig. S2**).  
317 This is consistent with a modest escape phage epidemic being able to establish by  
318 replicating on the susceptible fraction of the host population.

319

320 Next, we were interested to see if phage survival across our diversity treatments was  
321 related to phage evolution. Phage can escape CRISPR interference by mutations in  
322 the protospacer or the protospacer-adjacent motif (PAM) (Deveau *et al.*, 2008;  
323 Mojica *et al.*, 2009; Semanova *et al.*, 2011; Westra *et al.*, 2013). Given that a large  
324 proportion of the host population was resistant to the escape phage, there would  
325 likely have been strong selection to acquire mutations in other protospacers and  
326 PAMs to infect other hosts in the population. Indeed, we found that escape phage  
327 survival tended to be related to expanded infectivity range. Further, the proportion of  
328 escape phage that evolved an expanded infectivity range generally increased with  
329 time ( $\chi^2_{(1)} = 130.7$ ,  $p < 1 \times 10^{-10}$ ) (**Fig. 2**). The evolution of range expansion did also  
330 depend on diversity ( $\chi^2_{(1)} = 6.6$ ,  $p = 0.01$ ), being most likely in the 6-clone treatment,



331 particularly at 3 days post-infection (dpi) (**Fig. 2**). This is consistent with the idea that  
332 intermediate host diversity maximises evolutionary emergence (Benmayor *et al.*,  
333 2009; Chabas *et al.*, 2018).

334

335 We were very surprised to observe phage in two replicates of the 24-clone treatment  
336 had evolved via host shift. Here, infectivity on the original host is lost but phage  
337 evolved to infect a new host. This is a less likely event as it involves two mutations:  
338 back-mutation to the ancestral state at the original protospacer and mutation at the  
339 new protospacer, while incurring the cost of loss of infectivity on the original host.  
340 This could therefore be expected if the initial escape mutation was costly (it may  
341 cause a deleterious loss-of-function), or if there was sufficient selection pressure  
342 from the diverse population (Chabas *et al.*, 2018). Sequence data confirmed that  
343 single nucleotide polymorphisms (SNPs) in the PAM that conferred infectivity to the  
344 original host had been lost, and novel SNPs or deletions had emerged in  
345 protospacers that conferred infectivity to a new host present in the population  
346 (**Tables S4 & S5**). The original escape mutations are unlikely to have been costly as  
347 they are due to a SNP in the PAM sequence (**Tables S4 & S5**), so the observed host  
348 shift may have instead been driven by the selection pressure induced by high host  
349 CRISPR diversity. Together, these data show that phage survival was at least in part  
350 driven by evolutionary emergence of phage via selection for an expanded infectivity  
351 range, and that host shift could enable transient phage survival in conditions of very  
352 high host CRISPR allele diversity.

353

354 Given that CRISPR allele diversity negatively affected phage persistence by limiting  
355 evolutionary emergence, we reasoned that this could also lead to enhanced fitness

356 of the CRISPR population as a whole (van Houte *et al.*, 2016), as well as enhanced  
357 fitness of the sensitive clone that can be infected by the escape phage. We did find  
358 that all polyclonal CRISPR populations had higher CRISPR selection rates  
359 compared to clonal populations during infection with escape phage (**Fig. 3A**).  
360 However, within the polyclonal populations, we did not detect a relationship between  
361 diversity and CRISPR selection rate when controlling for the effect of time ( $\chi^2_{(1)} =$   
362  $1.90, p = 0.17$ )(**Fig. 3A; Fig. S3**). CRISPR selection rate also did not change notably  
363 over time ( $\chi^2_{(1)} = 0.04, p = 0.84$ ), even though phage densities decreased with time.  
364 Although we did not detect a statistically notable relationship between CRISPR allele  
365 diversity and CRISPR selection rate as expected, this may be because escape  
366 phage dynamics were dependent on the susceptible subpopulation. Additionally,  
367 host range expansion mutants were both rare and their dynamics would remain  
368 linked to the originally susceptible host. Hence, any benefit of diversity seen by the  
369 resistant subpopulation might be obscured by more detectable benefits seen by the  
370 susceptible subpopulation.

371

372 Consistent with this idea, CRISPR selection rate did not differ statistically between  
373 treatments infected with ancestral or pre-evolved phage (**Fig. 3A**), suggesting that  
374 CRISPR allele diversity protects the susceptible subpopulation from infection.  
375 Further, we found that susceptible hosts in the 3- and 6-clone treatments were on  
376 average as competitive as the other (resistant) CRISPR clones (mean selection rate  
377 [95% CI]; 3-clone: -0.10 [-1.53, 1.07]; 6-clone: 0.45 [-0.91, 1.49]). Selection rates in  
378 the 12- and 24-clone treatments were also higher than the 3- and 6-clone treatments  
379 (12-clone: 1.53 [0.03, 2.54]; 24-clone: 1.30 [0.25, 2.66]), indicating that susceptible  
380 clones did gain a competitive advantage from population-level CRISPR allele

381 diversity (**Fig. 3B**). There was also a slight increase in selection rate over time (**Fig.**  
382 **S4**) which, while statistically marginal ( $\chi^2_{(1)} = 2.60$ ,  $p = 0.10$ ), may indicate a link with  
383 the decline in phage population sizes over time. These data suggest that a  
384 susceptible genotype receives a fitness benefit from the protective effect of CRISPR-  
385 resistant bacteria and their CRISPR allele diversity (van Houte *et al.*, 2016).

386 **Discussion**

387

388 Previous studies have shown that CRISPR allele diversity can limit the evolution of  
389 phage to overcome host resistance (van Houte *et al.*, 2016; Chabas *et al.*, 2018). In  
390 those studies, bacterial populations were infected with ancestral phage that had not  
391 been previously exposed to resistant hosts. Here, we examined the consequences of  
392 CRISPR allele diversity once a phage has already evolved to overcome one of the  
393 CRISPR resistance alleles in the population. This tractable system enabled us to  
394 closely monitor how the level of CRISPR allele diversity influenced the population  
395 and evolutionary dynamics of the phage, as well as the evolutionary dynamics of the  
396 host.

397

398 These analyses show that fitness of both the CRISPR population as a whole, and  
399 that of the susceptible subpopulation, was higher in polyclonal versus monoclonal  
400 populations. They also show that phage population sizes were negatively affected by  
401 host diversity, which is consistent with previous studies (van Houte *et al.*, 2016).  
402 Moreover, we observed a negative correlation between phage amplification and  
403 fitness of the sensitive sub-population that could be infected by the escape phage.  
404 This is presumably because phage replication depends on the density of susceptible  
405 hosts, and increasing host diversity reduces susceptible host density. This “dilution  
406 effect” of host resistance allele diversity is an important factor in explaining why  
407 genetically diverse host populations often have reduced pathogen loads (Keesing *et al.*  
408 *et al.*, 2006; Ostfeld & Keesing, 2012; Civitello *et al.*, 2015). In theory, these  
409 epidemiological effects can in turn shape the evolutionary dynamics of the bacteria-  
410 phage interaction, since smaller phage population sizes will decrease the mutation

411 supply and hence the evolutionary potential of the phage (Antia *et al.*, 2003;  
412 Dennehy *et al.*, 2006; Yates *et al.*, 2006). Consistent with this, our data show that  
413 phage population and evolutionary dynamics are tightly linked. In less-diverse host  
414 populations, susceptible clones were at higher relative frequency, which promoted  
415 phage reproduction. The larger the phage population size, the greater the likelihood  
416 phage evolved to increase its host range.

417

418 Interestingly, the frequency at which host range mutants of the phage were identified  
419 peaked at intermediate levels of CRISPR allele diversity, namely in the 6-clone  
420 treatment. This is likely because increasing host diversity dilutes susceptible hosts,  
421 which results in smaller phage population size and hence less genetic variation in  
422 the phage population on which selection can act. Increasing host diversity can  
423 simultaneously increase selection for escape mutations. These two effects can  
424 maximise evolutionary emergence at intermediate host diversity (Chabas *et al.*,  
425 2018). Further, the instances of phage evolving host shift in our most diverse  
426 treatment were possibly related to a small initial escape phage epidemic establishing  
427 on susceptible hosts, which allowed host shift to occur. Although host shift only led  
428 to transient phage survival in our experiment, the effect of a susceptible host fraction  
429 in the context of a diverse, mostly-resistant population may have implications for  
430 more complex host-pathogen systems. Host shift mutants could gain an advantage  
431 due to changes in host genotype composition, for example when able to migrate to  
432 more susceptible subpopulations; or due to changes in reproductive mode in  
433 response to environmental change (King *et al.*, 2011).

434

435 In this study, we focussed on host populations where different CRISPR resistance  
436 genotypes were at equal starting frequencies, but natural communities are often  
437 composed of a few very common and many rare variants (Pachepsky *et al.*, 2001;  
438 McGill *et al.*, 2007). This likely matters for the observed dynamics, since the  
439 proportion of susceptible hosts has a large impact on the probability of evolutionary  
440 emergence of pathogens (Chabas *et al.*, 2018). Also, we focussed our analysis on  
441 the simple case where a diverse host population is infected by a clonal pathogen  
442 population. In nature, pathogen populations will frequently be genetically diverse as  
443 well (Hudson *et al.*, 2006; Telfer *et al.*, 2010), and increased levels of pathogen  
444 diversity may affect the benefits of host diversity (Ganz & Ebert, 2010). Indeed,  
445 previous studies of CRISPR-phage interactions suggest that infection by two  
446 different phages can increase bacteria-phage coexistence compared to infections  
447 with a single phage (Paez-Espino *et al.*, 2013; Paez-Espino *et al.*, 2015). The  
448 empirical system used in this study offers both a unique ability to link genotypes and  
449 phenotypes, as well as tight experimental control over the infectivity matrix of the  
450 host-phage interaction. These features will make it an ideal system for more detailed  
451 studies to understand how the composition of the host population and the relative  
452 diversity levels of the phage and host shape coevolutionary interactions.

453 **Acknowledgements**

454

455 We thank Meaghan Castledine for help constructing the pBAM1(Gm)\_lacZ plasmid.

456 JC acknowledges funding from the Biotechnology and Biological Sciences Research

457 Council ([bbsrc.ac.uk/](http://bbsrc.ac.uk/)) (BB/J014400/1 and BB/M009122/1). DWS acknowledges

458 funding from the Medical Research Council ([mrc.ukri.org](http://mrc.ukri.org/)) (MR/N013794/1). SVH

459 acknowledges funding from the BBSRC (BB/R010781/1) and from the People

460 Programme (Marie Curie Actions; [ec.europa.eu/research/mariecurieactions/](http://ec.europa.eu/research/mariecurieactions/)) of the

461 European Union's Horizon 2020 (REA grant agreement no. 660039). ERW

462 acknowledges funding from the Natural Environment Research Council ([nerc.ac.uk](http://nerc.ac.uk))

463 (NE/M018350/1), the European Research Council ([erc.europa.eu](http://erc.europa.eu)) (ERC-STG-2016-

464 714478 – EVOIMMECH) and the BBSRC (BB/N017412/1).

465

466 **Figure captions**

467

468 **Figure 1** Population dynamics of phage at different levels of CRISPR allele diversity  
469 in the host population. Black lines show the plaque-forming units (pfu) ml<sup>-1</sup> in  
470 individual replicates over time. The limit of phage detection is 200 pfu ml<sup>-1</sup>.

471

472 **Figure 2** Proportion of phage that had evolved an expanded infectivity range, i.e.  
473 phage that could infect a second CRISPR-resistant clone in addition to the original  
474 CRISPR clone they were pre-evolved to infect, shown in Fig. S1. Means are shown  
475 as white points with 67, 89 and 95% confidence intervals given in decreasing width.

476

477 **Figure 3** Selection rate of **A)** all CRISPR clones relative to surface mutants and **B)**  
478 the susceptible CRISPR clones relative to resistant CRISPR clones in the population  
479 for each CRISPR allele diversity treatment. Selection rate is the natural log of the  
480 relative change in density of one competitor against another. The dotted line at zero  
481 indicates no difference in density change i.e. the susceptible and resistant CRISPR  
482 clones are equally fit. Means are derived from a generalised linear mixed model that  
483 statistically controls for the effect of time. Means are shown as white points with 67,  
484 89 and 95% confidence intervals given in decreasing width.

485



486 **References**

487

488 Acevedo-Whitehouse, K., Gulland, F., Greig, D., & Amos, W. (2003). Inbreeding:  
489 disease susceptibility in California sea lions. *Nature*, 422(6927), 35.

490 Altermatt, F., & Ebert, D. (2008). Genetic diversity of *Daphnia magna* populations  
491 enhances resistance to parasites. *Ecol Lett*, 11(9), 918-928.

492 doi:10.1111/j.1461-0248.2008.01203.x

493 Andersson, A. F., & Banfield, J. F. (2008). Virus population dynamics and acquired  
494 virus resistance in natural microbial communities. *Science*, 320(5879), 1047-  
495 1050. doi:10.1126/science.1157358

496 Antia, R., Regoes, R. R., Koella, J. C., & Bergstrom, C. T. (2003). The role of  
497 evolution in the emergence of infectious diseases. *Nature*, 426(6967), 658.

498 Bache, S. M., & Wickham, H. (2014). magrittr: A Forward-Pipe Operator for R  
499 (Version 1.5). Retrieved from <https://cran.r-project.org/package=magrittr>

500 Benmayor, R., Hodgson, D. J., Perron, G. G., & Buckling, A. (2009). Host mixing and  
501 disease emergence. *Curr Biol*, 19(9), 764-767.

502 Brouns, S. J. J., Jore, M. M., Lundgren, M., Westra, E. R., Slijkhuis, R. J. H.,  
503 Snijders, A. P. L., . . . van der Oost, J. (2008). Small CRISPR RNAs Guide  
504 Antiviral Defense in Prokaryotes. *Science*, 321(5891), 960-964.  
505 doi:10.1126/science.1159689

506 Burnham, K. P., & Anderson, D. R. (2003). *Model selection and multimodel*  
507 *inference: a practical information-theoretic approach*. New York: Springer.

- 508 Burnham, K. P., & Anderson, D. R. (2004). Multimodel inference: understanding AIC  
509 and BIC in model selection. *Sociol Methods Res*, 33(2), 261-304.
- 510 Cady, K. C., Bondy-Denomy, J., Heussler, G. E., Davidson, A. R., & O'Toole, G. A.  
511 (2012). The CRISPR/Cas Adaptive Immune System of *Pseudomonas*  
512 *aeruginosa* Mediates Resistance to Naturally Occurring and Engineered  
513 Phages. *J Bacteriol*, 194(21), 5728-5738. doi:10.1128/jb.01184-12
- 514 Chabas, H., Lion, S., Nicot, A., Meaden, S., van Houte, S., Moineau, S., . . . Gandon,  
515 S. (2018). Evolutionary emergence of infectious diseases in heterogeneous  
516 host populations. *PLoS Biol*, 16(9), e2006738.  
517 doi:10.1371/journal.pbio.2006738
- 518 Civitello, D. J., Cohen, J., Fatima, H., Halstead, N. T., Liriano, J., McMahon, T. A., . . .  
519 . Young, S. (2015). Biodiversity inhibits parasites: broad evidence for the  
520 dilution effect. *Proc Natl Acad Sci USA*, 112(28), 8667-8671.
- 521 Common, J., Morley, D., van Houte, S., & Westra, E. R. (2019). CRISPR-Cas  
522 immunity leads to a coevolutionary arms race between *Streptococcus*  
523 *thermophilus* and lytic phage. *Philos Trans Royal Soc B*.  
524 doi:10.1098/rstb.2018.0098
- 525 Common, J., & Westra, E. R. (2019). CRISPR evolution and bacteriophage  
526 persistence in the context of population bottlenecks. *RNA Biol*.
- 527 Datsenko, K. A., Pougach, K., Tikhonov, A., Wanner, B. L., Severinov, K., &  
528 Semenova, E. (2012). Molecular memory of prior infections activates the  
529 CRISPR/Cas adaptive bacterial immunity system. *Nat Commun*, 3, 945.

530 doi:[http://www.nature.com/ncomms/journal/v3/n7/supinfo/ncomms1937\\_S1.htm](http://www.nature.com/ncomms/journal/v3/n7/supinfo/ncomms1937_S1.htm)

531 |

532 Dennehy, J. J., Friedenber, N. A., Holt, R. D., & Turner, P. E. (2006). Viral ecology  
533 and the maintenance of novel host use. *Am Nat*, 167(3), 429-439.

534 Dennehy, J. J., Friedenber, N. A., Yang, Y. W., & Turner, P. E. (2007). Virus  
535 population extinction via ecological traps. *Ecol Lett*, 10(3), 230-240.

536 Deveau, H., Barrangou, R., Garneau, J. E., Labonté, J., Fremaux, C., Boyaval, P., . .  
537 . Moineau, S. (2008). Phage Response to CRISPR-Encoded Resistance in  
538 *Streptococcus thermophilus*. *J Bacteriol*, 190(4), 1390-1400.  
539 doi:10.1128/jb.01412-07

540 Dobson, A. (2004). Population dynamics of pathogens with multiple host species.  
541 *Am Nat*, 164(S5), S64-S78.

542 Eastwood, J. R., Ribot, R. F., Rollins, L. A., Buchanan, K. L., Walder, K., Bennett, A.  
543 T., & Berg, M. L. (2017). Host heterozygosity and genotype rarity affect viral  
544 dynamics in an avian subspecies complex. *Sci Rep*, 7(1), 13310.

545 Ebert, D., Altermatt, F., & Lass, S. (2007). A short term benefit for outcrossing in a  
546 *Daphnia* metapopulation in relation to parasitism. *J Royal Soc Interface*,  
547 4(16), 777-785.

548 Ellison, A. M., & Adamec, L. (2011). Ecophysiological traits of terrestrial and aquatic  
549 carnivorous plants: are the costs and benefits the same? *Oikos*, 120(11),  
550 1721-1731. doi:10.1111/j.1600-0706.2011.19604.x

- 551 Elton, C. S. (1958). *The ecology of invasions by animals and plants*. London:  
552 Methuen & Co.
- 553 Ferrieres, L., Hémerly, G., Nham, T., Guérout, A.-M., Mazel, D., Beloin, C., & Ghigo,  
554 J.-M. (2010). Silent mischief: bacteriophage Mu insertions contaminate  
555 products of *Escherichia coli* random mutagenesis performed using suicidal  
556 transposon delivery plasmids mobilized by broad-host-range RP4 conjugative  
557 machinery. *J Bacteriol*, 192(24), 6418-6427.
- 558 Gandon, S. (2004). Evolution of multihost parasites. *Evolution*, 58(3), 455-469.
- 559 Ganz, H. H., & Ebert, D. (2010). Benefits of host genetic diversity for resistance to  
560 infection depend on parasite diversity. *Ecology*, 91(5), 1263-1268.  
561 doi:10.1890/09-1243.1
- 562 Garneau, J. E., Dupuis, M.-E., Villion, M., Romero, D. A., Barrangou, R., Boyaval, P.,  
563 . . . Moineau, S. (2010). The CRISPR/Cas bacterial immune system cleaves  
564 bacteriophage and plasmid DNA. *Nature*, 468(7320), 67-71.  
565 doi:<http://www.nature.com/nature/journal/v468/n7320/abs/nature09523.html> -  
566 [supplementary-information](#)
- 567 Henry, L., & Wickham, H. (2018). tidy: Easily Tidy Data with 'spread()' and 'gather()'  
568 Functions [0.8.2]. Retrieved from <https://cran.r-project.org/package=tidy>
- 569 Horvath, P., Romero, D. A., Coute-Monvoisin, A. C., Richards, M., Deveau, H.,  
570 Moineau, S., . . . Barrangou, R. (2008). Diversity, activity, and evolution of  
571 CRISPR loci in *Streptococcus thermophilus*. *J Bacteriol*, 190(4), 1401-1412.  
572 doi:10.1128/JB.01415-07

- 573 Hudson, P. J., Dobson, A. P., & Lafferty, K. D. (2006). Is a healthy ecosystem one  
574 that is rich in parasites? *Trends Ecol Evol*, 21(7), 381-385.
- 575 Kearse, M., Moir, R., Wilson, A., Stones-Havas, S., Cheung, M., Sturrock, S., . . .  
576 Duran, C. (2012). Geneious Basic: an integrated and extendable desktop  
577 software platform for the organization and analysis of sequence data.  
578 *Bioinformatics*, 28(12), 1647-1649.
- 579 Keesing, F., Holt, R. D., & Ostfeld, R. S. (2006). Effects of species diversity on  
580 disease risk. *Ecol Lett*, 9(4), 485-498.
- 581 Kerstes, N. A., & Wegner, K. M. (2011). The effect of inbreeding and outcrossing of  
582 *Tribolium castaneum* on resistance to the parasite *Nosema whitei*. *Evol Ecol*  
583 *Res*, 13(7), 681-696.
- 584 King, K. C., Delph, L. F., Jokela, J., & Lively, C. M. (2011). Coevolutionary hotspots  
585 and coldspots for host sex and parasite local adaptation in a snail–trematode  
586 interaction. *Oikos*, 120(9), 1335-1340. doi:10.1111/j.1600-0706.2011.19241.x
- 587 Lenski, R. E. (1991). Quantifying fitness and gene stability in microorganisms.  
588 *Biotechnology*, 15, 173-192.
- 589 Lively, C. M. (2010). The Effect of Host Genetic Diversity on Disease Spread. *Am*  
590 *Nat*, 175(6), E149-E152. doi:10.1086/652430
- 591 López-Urbe, M. M., Appler, R. H., Youngsteadt, E., Dunn, R. R., Frank, S. D., &  
592 Tarpy, D. R. (2017). Higher immunocompetence is associated with higher  
593 genetic diversity in feral honey bee colonies (*Apis mellifera*). *Conserv Genet*,  
594 18(3), 659-666.

- 595 Luijckx, P., Fienberg, H., Duneau, D., & Ebert, D. (2013). A Matching-Allele Model  
596 Explains Host Resistance to Parasites. *Curr Bio*.
- 597 Marraffini, L. A., & Sontheimer, E. J. (2008). CRISPR interference limits horizontal  
598 gene transfer in staphylococci by targeting DNA. *Science*, 322(5909), 1843-  
599 1845.
- 600 Martínez-García, E., Aparicio, T., de Lorenzo, V., & Nikel, P. I. (2014). New  
601 transposon tools tailored for metabolic engineering of Gram-negative  
602 microbial cell factories. *Front Bioeng Biotech*, 2, 46.
- 603 McGill, B. J., Etienne, R. S., Gray, J. S., Alonso, D., Anderson, M. J., Benecha, H.  
604 K., . . . He, F. (2007). Species abundance distributions: moving beyond single  
605 prediction theories to integration within an ecological framework. *Ecol Lett*,  
606 10(10), 995-1015.
- 607 Meagher, S. (1999). Genetic diversity and *Capillaria hepatica* (Nematoda)  
608 prevalence in Michigan deer mouse populations. *Evolution*, 53(4), 1318-1324.
- 609 Mojica, F. J., Diez-Villasenor, C., Garcia-Martinez, J., & Almendros, C. (2009). Short  
610 motif sequences determine the targets of the prokaryotic CRISPR defence  
611 system. *Microbiology*, 155(Pt 3), 733-740. doi:10.1099/mic.0.023960-0
- 612 Morley, D., Broniewski, J. M., Westra, E. R., Buckling, A., & van Houte, S. (2017).  
613 Host diversity limits the evolution of parasite local adaptation. *Mol Ecol*, 26(7),  
614 1756-1763.

- 615 O'Brien, S. J., Roelke, M. E., Marker, L., Newman, A., Winkler, C., Meltzer, D., . . .  
616 Wildt, D. E. (1985). Genetic basis for species vulnerability in the cheetah.  
617 *Science*, 227(4693), 1428-1434.
- 618 Ohtsuki, A., & Sasaki, A. (2006). Epidemiology and disease-control under gene-for-  
619 gene plant–pathogen interaction. *J Theor Biol*, 238(4), 780-794.
- 620 Ostfeld, R. S., & Keesing, F. (2012). Effects of host diversity on infectious disease.  
621 *Annu Rev Ecol Evol Syst*, 43.
- 622 Pachepsky, E., Crawford, J. W., Bown, J. L., & Squire, G. (2001). Towards a general  
623 theory of biodiversity. *Nature*, 410(6831), 923.
- 624 Paez-Espino, D., Morovic, W., Sun, C. L., Thomas, B. C., Ueda, K.-i., Stahl, B., . . .  
625 Banfield, J. F. (2013). Strong bias in the bacterial CRISPR elements that  
626 confer immunity to phage. *Nat Commun*, 4, 1430.
- 627 Paez-Espino, D., Sharon, I., Morovic, W., Stahl, B., Thomas, B. C., Barrangou, R., &  
628 Banfield, J. F. (2015). CRISPR immunity drives rapid phage genome evolution  
629 in *Streptococcus thermophilus*. *MBio*, 6(2). doi:10.1128/mBio.00262-15
- 630 Pearman, P. B., & Garner, T. W. (2005). Susceptibility of Italian agile frog  
631 populations to an emerging strain of Ranavirus parallels population genetic  
632 diversity. *Ecol Lett*, 8(4), 401-408.
- 633 R Core Team. (2018). R: A language and environment for statistical computing  
634 (Version 3.5.2 "Eggshell Igloo"). Vienna, Austria: R Foundation for Statistical  
635 Computing. Retrieved from <http://www.r-project.org/>

- 636 Sasaki, A. (2000). Host-parasite coevolution in a multilocus gene-for-gene system.  
637 *Proc Royal Soc B* 267(1458), 2183-2188.
- 638 Semenova, E., Jore, M. M., Datsenko, K. A., Semenova, A., Westra, E. R., Wanner,  
639 B., . . . Severinov, K. (2011). Interference by clustered regularly interspaced  
640 short palindromic repeat (CRISPR) RNA is governed by a seed sequence.  
641 *Proc Natl Acad Sci USA*, 108(25), 10098-10103.  
642 doi:10.1073/pnas.1104144108
- 643 Spielman, D., Brook, B. W., Briscoe, D. A., & Frankham, R. (2004). Does inbreeding  
644 and loss of genetic diversity decrease disease resistance? *Conserv Genet*,  
645 5(4), 439-448.
- 646 Sun, C. L., Thomas, B. C., Barrangou, R., & Banfield, J. F. (2016). Metagenomic  
647 reconstructions of bacterial CRISPR loci constrain population histories. *ISME*  
648 *J*, 10(4), 858-870. doi:10.1038/ismej.2015.162
- 649 Telfer, S., Lambin, X., Birtles, R., Beldomenico, P., Burthe, S., Paterson, S., &  
650 Begon, M. (2010). Species interactions in a parasite community drive infection  
651 risk in a wildlife population. *Science*, 330(6001), 243-246.
- 652 Thorne, E. T., & Williams, E. S. (1988). Disease and endangered species: the  
653 black-footed ferret as a recent example. *Conserv Biol*, 2(1), 66-74.
- 654 Travisano, M., & Lenski, R. E. (1996). Long-term experimental evolution in  
655 *Escherichia coli*. IV. Targets of selection and the specificity of adaptation.  
656 *Genetics*, 143(1), 15-26.



- 657 van Houte, S., Ekroth, A. K. E., Broniewski, J. M., Chabas, H., Ashby, B., Bondy-  
658 Denomy, J., . . . Westra, E. R. (2016). The diversity-generating benefits of a  
659 prokaryotic adaptive immune system. *Nature*, *532*(7599), 385-388.  
660 doi:10.1038/nature17436
- 661 Westra, E. R., Semenova, E., Datsenko, K. A., Jackson, R. N., Wiedenheft, B.,  
662 Severinov, K., & Brouns, S. J. (2013). Type IE CRISPR-cas systems  
663 discriminate target from non-target DNA through base pairing-independent  
664 PAM recognition. *PLoS Genet*, *9*(9), e1003742.
- 665 Westra, E. R., Sünderhauf, D., Landsberger, M., & Buckling, A. (2017). Mechanisms  
666 and consequences of diversity-generating immune strategies. *Nat Rev*  
667 *Immunol*, *17*(11), 719.
- 668 Westra, E. R., van Houte, S., Oyesiku-Blakemore, S., Makin, B., Broniewski,  
669 Jenny M., Best, A., . . . Buckling, A. (2015). Parasite Exposure Drives  
670 Selective Evolution of Constitutive versus Inducible Defense. *Curr Biol*, *25*(8),  
671 1043-1049. doi:10.1016/j.cub.2015.01.065
- 672 Whiteman, N. K., Kimball, R. T., & Parker, P. G. (2007). Co-phylogeography and  
673 comparative population genetics of the threatened Galápagos hawk and three  
674 ectoparasite species: ecology shapes population histories within parasite  
675 communities. *Mol Ecol*, *16*(22), 4759-4773.
- 676 Wickham, H. (2009). *ggplot2: Elegant Graphics for Data Analysis*: Springer-Verlag  
677 New York. Retrieved from <http://ggplot2.org/>

- 678 Wickham, H., François, R., Henry, L., & Müller, K. (2018). dplyr: A Grammar of Data  
679 Manipulation (Version 0.7.8). Retrieved from [https://cran.r-](https://cran.r-project.org/package=dplyr)  
680 [project.org/package=dplyr](https://cran.r-project.org/package=dplyr)
- 681 Yates, A., Antia, R., & Regoes, R. R. (2006). How do pathogen evolution and host  
682 heterogeneity interact in disease emergence? *Proc Royal Soc B*, 273(1605),  
683 3075-3083.
- 684 Zegans, M. E., Wagner, J. C., Cady, K. C., Murphy, D. M., Hammond, J. H., &  
685 O'Toole, G. A. (2009). Interaction between bacteriophage DMS3 and host  
686 CRISPR region inhibits group behaviors of *Pseudomonas aeruginosa*. *J*  
687 *Bacteriol*, 191(1), 210-219.
- 688 Zhu, Y., Chen, H., Fan, J., & Wang, Y. (2000). Genetic diversity and disease control  
689 in rice. *Nature*, 406(6797), 718.
- 690

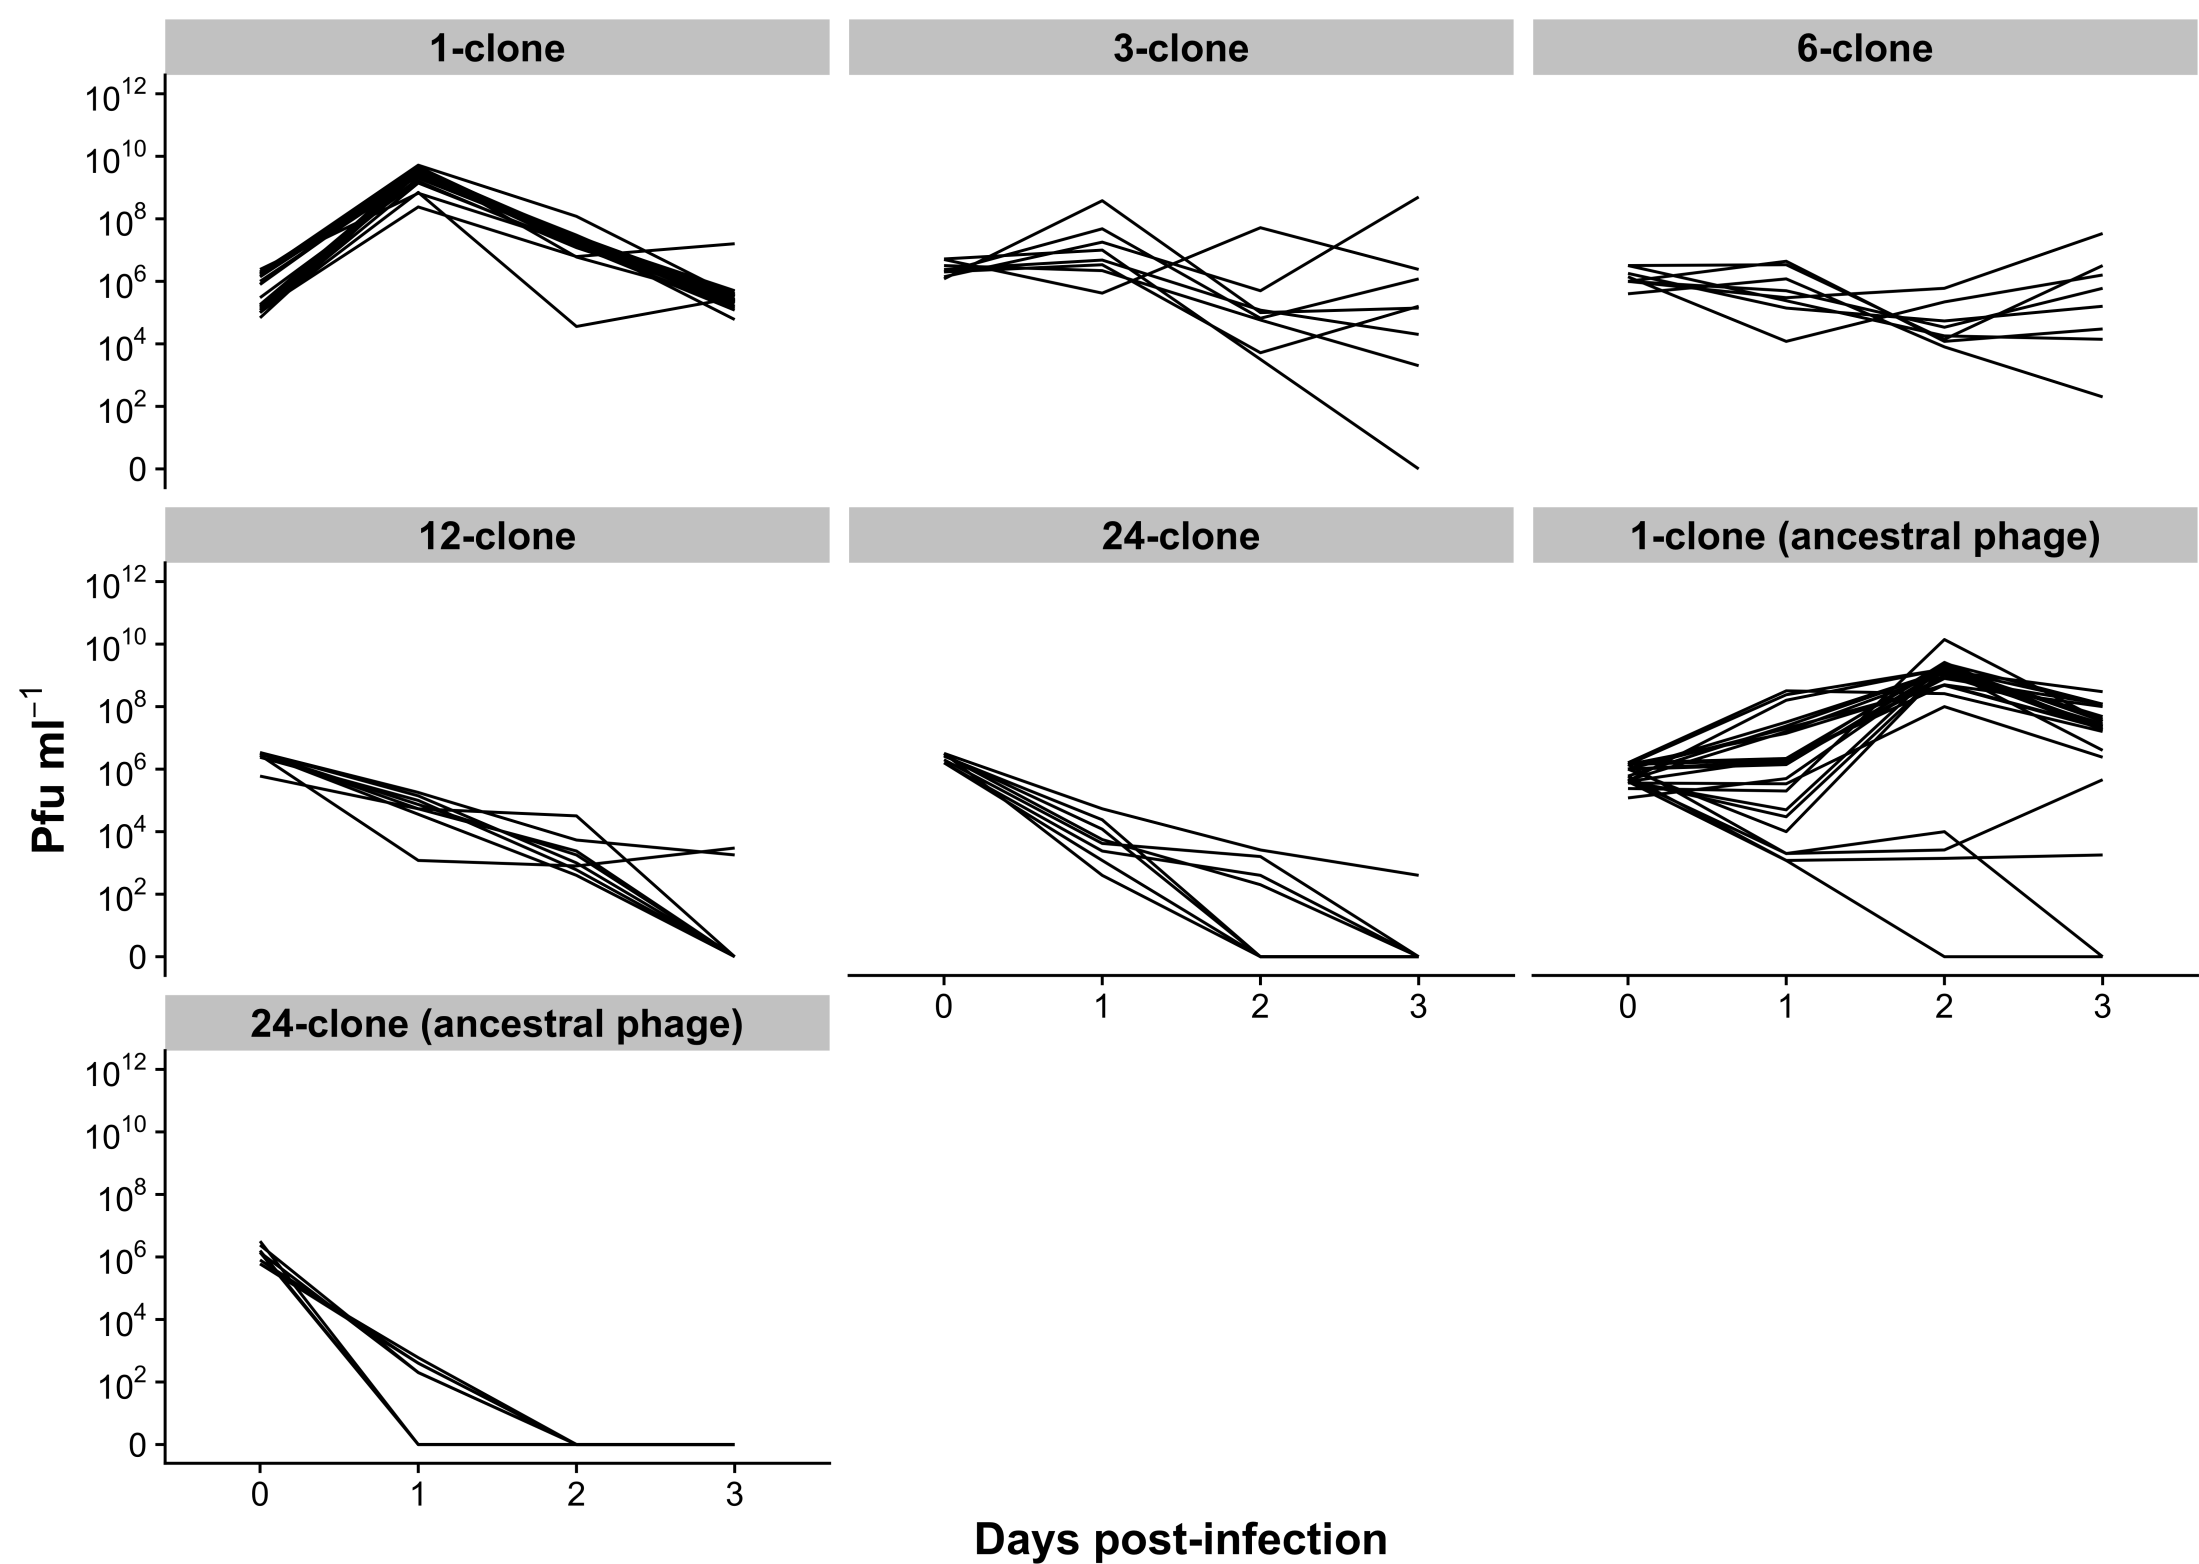

**Proportion of phage with expanded host range**

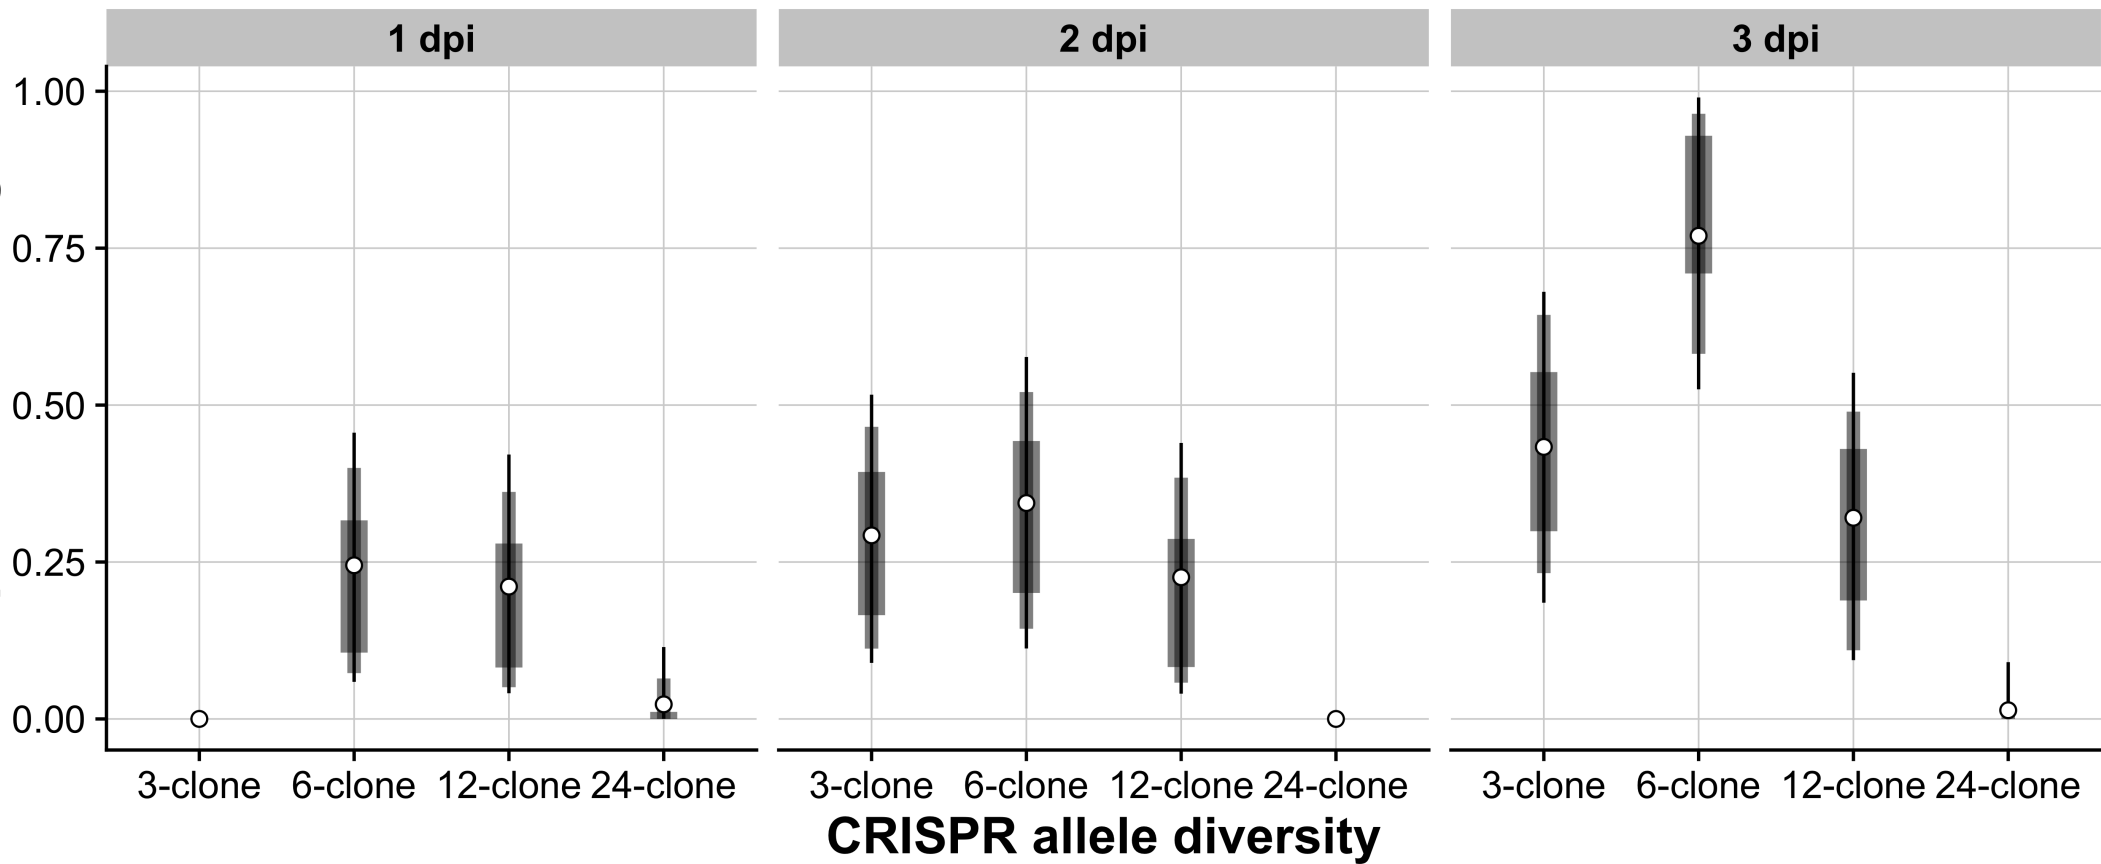

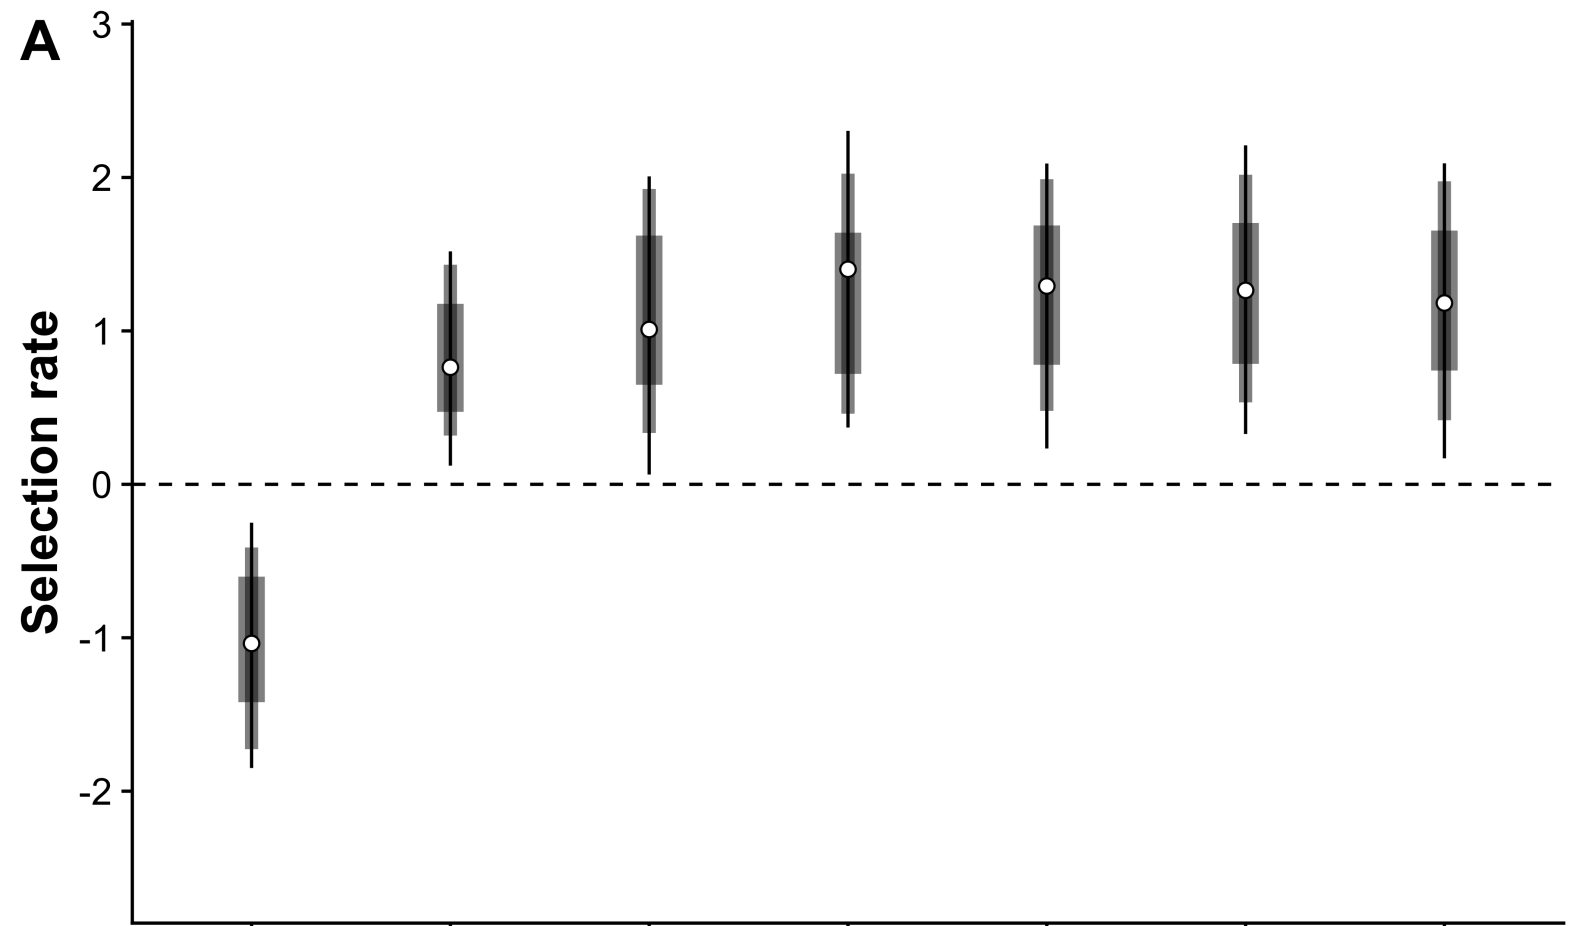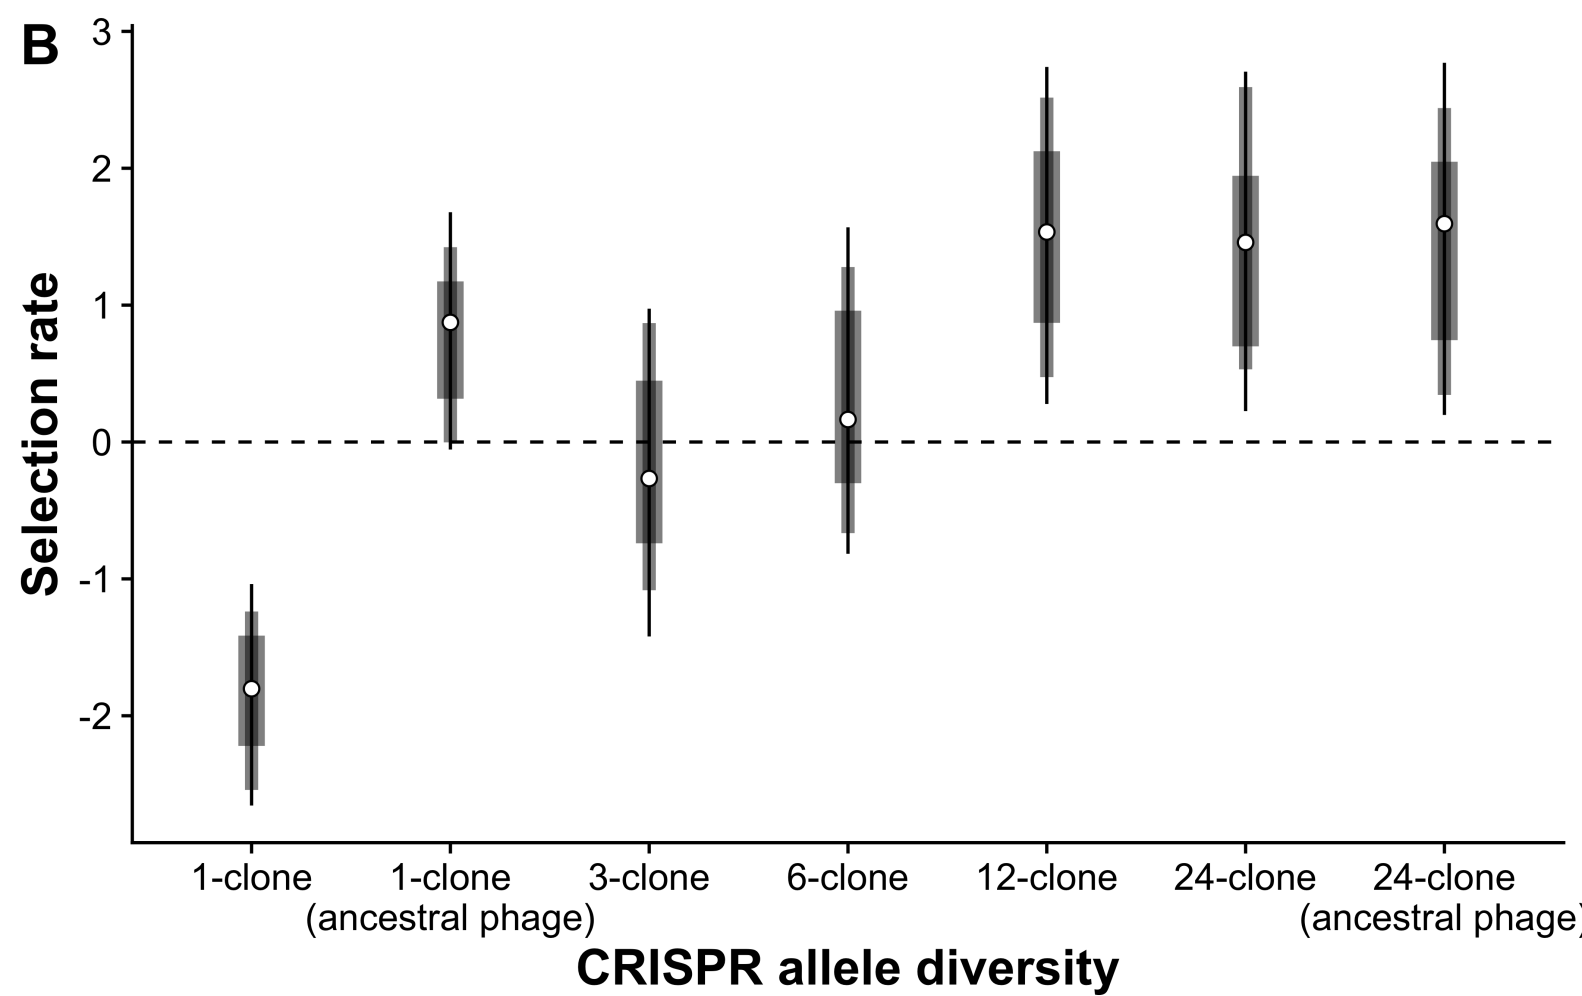

Source: http://biorxiv.org/content/10.1101/774349v1.full.pdf
